# Supplementary material for: Discoidin Domain Receptors Promote α1β1- and α2β1-Integrin Mediated Cell Adhesion to Collagen by Enhancing Integrin Activation
Source: PubMed Central journal article supplement (PMC3527415; doi:10.1371/journal.pone.0052209), 2012-12-20
Supplement: pone.0052209.s002.pdf [file pone.0052209.s002.pdf]

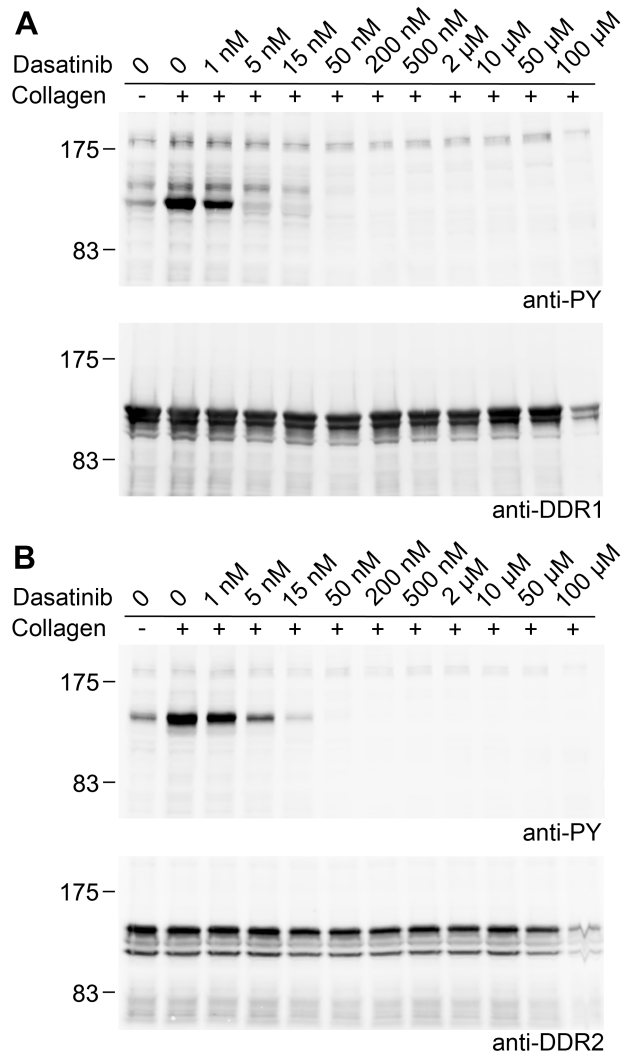

**Figure S2. Dasatinib inhibits collagen I-induced DDR autophosphorylation.** Full length DDR1b (A) or DDR2 (B) were transiently expressed in HEK293 cells. Cells were stimulated with 10  $\mu$ g/ml collagen I for 90 min in the absence or presence of dasatinib at the indicated concentrations. Aliquots of cell lysates were analyzed by SDS-PAGE and Western blotting. The blots were probed first with anti-phosphotyrosine mAb 4G10 (A & B, upper panels) and re-probed with anti-DDR1 (A, lower panel), or, for anti-DDR2, on a duplicate blot (B, lower panel).
